# Supplementary material for: Structure–property relationships of aromatic polyamides and polythioamides: comparative consideration with those of analogous polyesters, polythioesters and polydithioesters
Source: Royal Society of Chemistry journal article supplement (doi:10.1039/c5ra17883e), 2015-01-01
Supplement: c5ra17883e1.pdf [file c5ra17883e1.pdf]

## Supplementary Information

# Structure-property relationships of aromatic polyamides and polythioamides: comparative consideration with those of analogous polyesters, polythioesters and polydithioesters

Masayuki Nagasawa, Tatsuya Ishii, Daisuke Abe and Yuji Sasanuma\*

Department of Applied Chemistry and Biotechnology, Graduate School and Faculty of Engineering, Chiba University, 1-33 Yayoi-cho, Inage-ku, Chiba 263-8522, Japan

### Appendix A Statistical Weight Matrices $U_j$ 's ( $j$ , bond number) of PA2T and PTA2T

For the bond numbers, see Fig. 2. Here, the symbol  $\otimes$  stands for direct product.

$$U_1 = C_1 \otimes R_3 \quad (\text{A1})$$

$$U_2 = C_3 \otimes R_1 \quad (\text{A2})$$

$$U_3 = C_1 \otimes R_\gamma \quad (\text{A3})$$

$$U_4 = C_6 \otimes R_1 \quad (\text{A4})$$

$$U_5 = C_1 \otimes R_3 \quad (\text{A5})$$

$$U_6 = I_3 \otimes R_3 \quad (\text{A6})$$

$$U_7 = U_f = \begin{bmatrix} \sigma_{ttt} & \sigma_{tttg+} & \sigma_{ttg-} & 0 & 0 & 0 & 0 & 0 & 0 \\ 0 & 0 & 0 & \sigma_{tg+t} & \sigma_{tg+g+} & \sigma_{tg+g-} & 0 & 0 & 0 \\ 0 & 0 & 0 & 0 & 0 & 0 & \sigma_{tg-t} & \sigma_{tg-g+} & \sigma_{tg-g-} \\ \sigma_{g+tt} & \sigma_{g+tg+} & \sigma_{g+tg-} & 0 & 0 & 0 & 0 & 0 & 0 \\ 0 & 0 & 0 & \sigma_{g+g+t} & \sigma_{g+g+g+} & \sigma_{g+g+g-} & 0 & 0 & 0 \\ 0 & 0 & 0 & 0 & 0 & 0 & \sigma_{g+g-t} & \sigma_{g+g-g+} & \sigma_{g+g-g-} \\ \sigma_{g-tt} & \sigma_{g-tg+} & \sigma_{g-tg-} & 0 & 0 & 0 & 0 & 0 & 0 \\ 0 & 0 & 0 & \sigma_{g-g+t} & \sigma_{g-g+g+} & \sigma_{g-g+g-} & 0 & 0 & 0 \\ 0 & 0 & 0 & 0 & 0 & 0 & \sigma_{g-g-t} & \sigma_{g-g-g+} & \sigma_{g-g-g-} \end{bmatrix} \quad (\text{A7})$$

$$U_a = C_3 \otimes I_3 \otimes R_1 \quad (\text{A8})$$

$$U_b = C_3 \otimes S_1 \otimes R_\gamma \quad (\text{A9})$$

$$U_c = C_1 \otimes I_6 \otimes R_1 \quad (\text{A10})$$

$$U_d = C_6 \otimes S_1 \otimes R_3 \quad (\text{A11})$$

$$U_e = C_1 \otimes I_3 \otimes R_3 \quad (\text{A12})$$

and

$$U_n = C_3 \otimes I_3 \otimes R_1 \quad (\text{A13})$$

where

$$C_1 = \begin{bmatrix} 1 \\ 0 \\ 0 \end{bmatrix} \quad (\text{A14})$$

$$C_3 = \begin{bmatrix} 1 \\ 1 \\ 1 \end{bmatrix} \quad (\text{A15})$$

$$C_6 = \begin{bmatrix} 1 \\ 1 \\ 1 \\ 1 \\ 1 \\ 1 \end{bmatrix} \quad (\text{A16})$$

$$R_1 = \begin{bmatrix} 1 & 0 & 0 \end{bmatrix} \quad (\text{A17})$$

$$R_3 = \begin{bmatrix} 1 & 1 & 1 \end{bmatrix} \quad (\text{A18})$$

$$R_\gamma = \begin{bmatrix} \gamma_{t-t} & \gamma_{(t-c)^+} & \gamma_{(t-c)^-} & \gamma_{(c-t)^+} & \gamma_{(c-t)^-} & \gamma_{c-c} \end{bmatrix} \quad (\text{A19})$$

$$S_1 = \begin{bmatrix} 1 & 0 & 0 \\ 0 & 0 & 0 \\ 0 & 0 & 0 \end{bmatrix} \quad (\text{A20})$$

and  $I_3$  and  $I_6$  are the identity matrices of sizes 3 and 6 respectively, with  $\gamma_\xi = \exp(-\Delta G_\xi/RT)$  ( $\xi$ : orientation around bond 3 or b) and  $\sigma_k = \exp(-\Delta G_k/RT)$  ( $k$ : conformations in bonds 5, 6, and 7 or bonds d, e, and f).

### Appendix B Statistical Weight Matrices $U_j$ 's ( $j$ , bond number) of PA3T ans PTA3T

The  $U_1$  to  $U_6$  matrices are the same as those of PA2T ans PTA2T.

$$U_7 = I_3 \otimes I_3 \otimes R_3 \quad (\text{A21})$$

$$U_a = C_3 \otimes I_3 \otimes I_3 \otimes R_1 \quad (\text{A22})$$

$$U_b = C_3 \otimes I_3 \otimes S_1 \otimes R_\gamma \quad (\text{A23})$$

$$U_c = C_1 \otimes S_1 \otimes I_6 \otimes R_1 \quad (\text{A24})$$

$$U_d = C_1 \otimes I_6 \otimes S_1 \otimes R_3 \quad (\text{A25})$$

$$U_e = C_6 \otimes S_1 \otimes I_3 \otimes R_3 \quad (\text{A26})$$

$$U_f = C_1 \otimes I_3 \otimes I_3 \otimes R_3 \quad (\text{A27})$$

and

$$U_n = C_3 \otimes I_3 \otimes I_3 \otimes R_1 \quad (\text{A28})$$

The  $U_8$  and  $U_g$  matrices are defined on the next page.



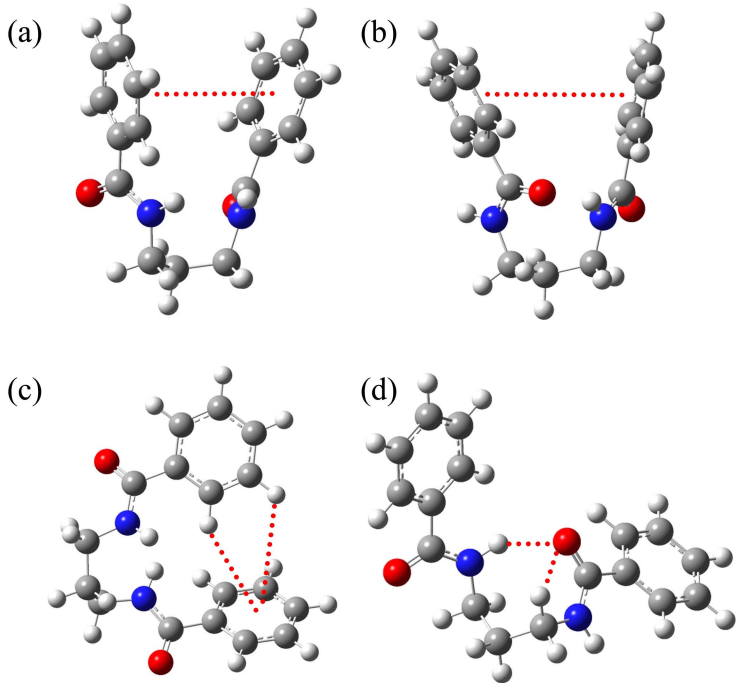

**Fig. S1** Intramolecular interactions of 3DBA:  $\pi/\pi$  of (a) g+g+g-g- and (b) g+g+g-g+; C-H... $\pi$  of (c) tg+g-g-; NH...O=C of g+g+g+g-.

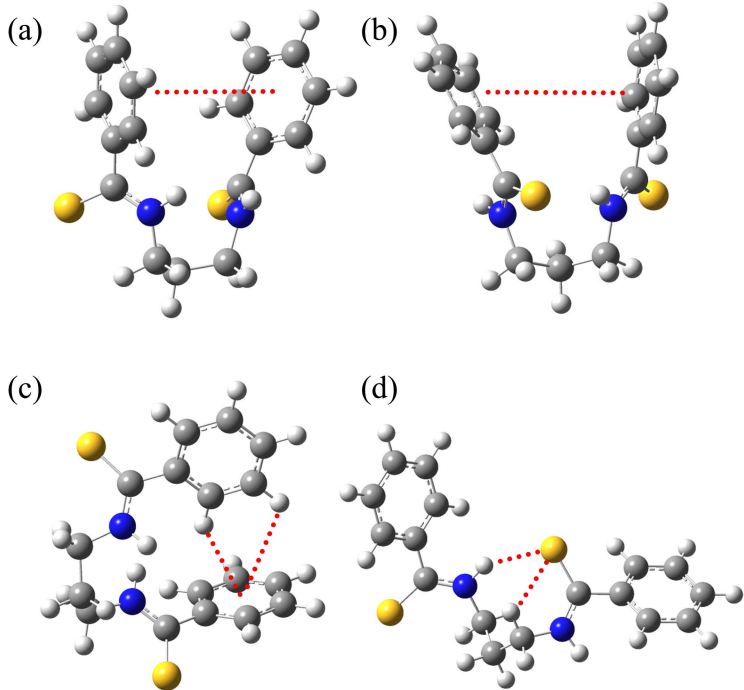

**Fig. S2** Intramolecular interactions of 3DBTA:  $\pi/\pi$  of (a) g+g+g-g- and (b) g+g+g-g+; C-H... $\pi$  of (c) tg+g-g-; NH...S=C of g+g+g-g-.

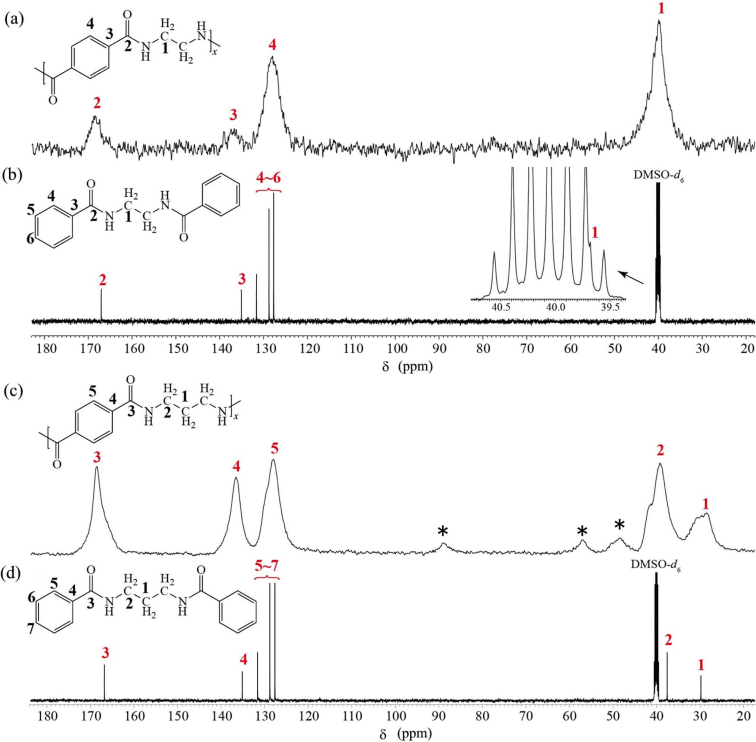

**Fig. S3** Solid-state  $^{13}\text{C}$  NMR spectra observed from (a) PA2T and (c) PA3T, compared with solution spectra from (b) 2DBA and (d) 3DBA dissolved in  $\text{DMSO}-d_6$ . The peaks were assigned as indicated, and the asterisk represents the spinning sideband.

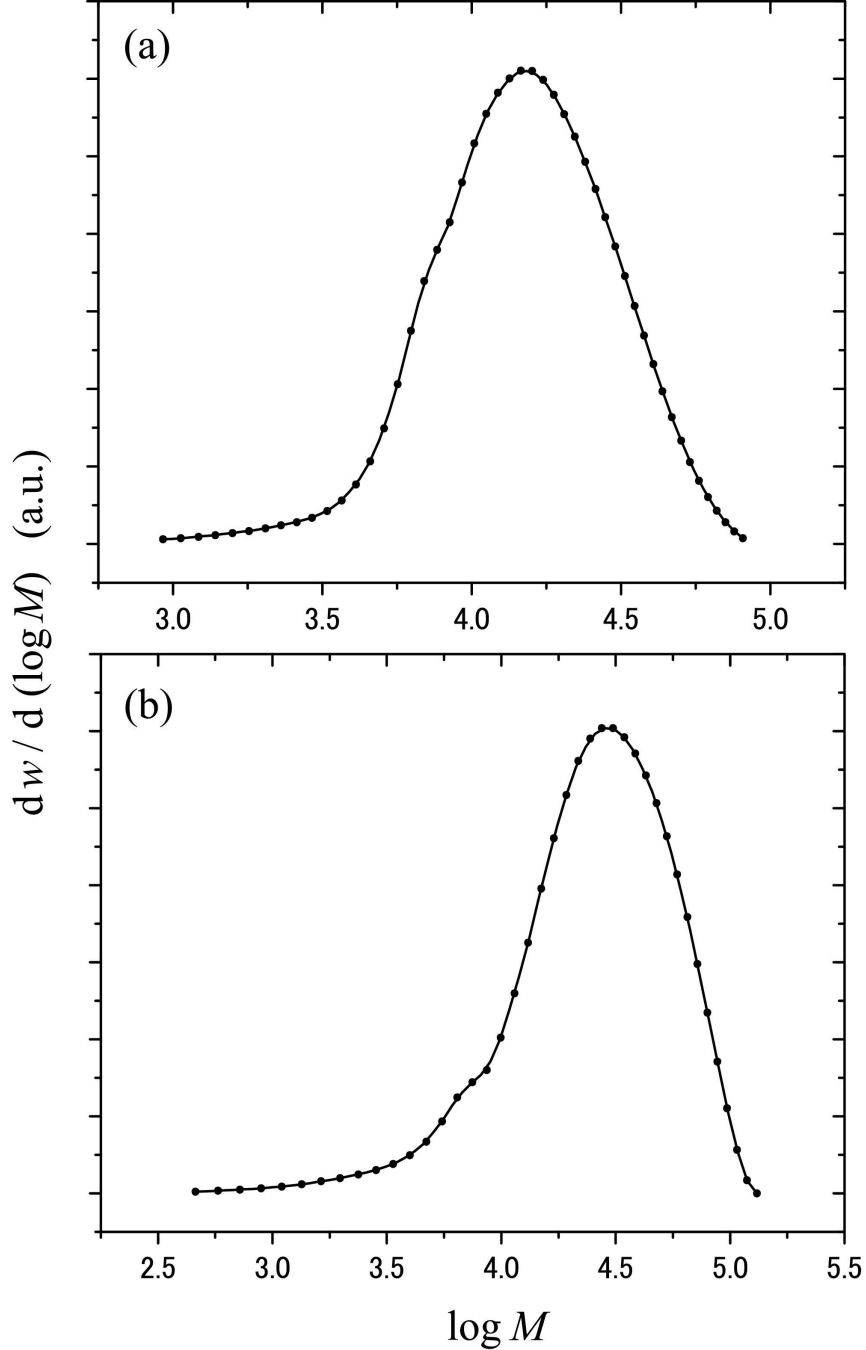

**Fig. S4** Molecular weight distributions of (a) PTA2T and (b) PTA3T.

**Table S1** Geometrical parameters of PA2T, used in the refined RIS calculations

| conformation      |                    |                    |         |                  |              |            |
|-------------------|--------------------|--------------------|---------|------------------|--------------|------------|
| bond <sup>a</sup> |                    |                    | $l_j^b$ | $\theta_{j-1}^c$ | $\theta_j^d$ | $\phi_j^e$ |
| $j-1$             | $j$                | $j+1$              |         |                  |              |            |
| bond a (c)        |                    |                    |         |                  |              |            |
| t                 | t                  | t-t                | 1.352   | 121.5            | 116.8        | 1.5        |
| g <sup>+</sup>    |                    |                    | 1.362   | 122.3            | 117.8        | -1.9       |
| g <sup>-</sup>    |                    |                    | 1.362   | 122.3            | 117.8        | 1.9        |
| t                 | t                  | (t-c) <sup>+</sup> | 1.352   | 121.5            | 116.7        | 0.3        |
| g <sup>+</sup>    |                    |                    | 1.361   | 122.4            | 117.9        | -0.7       |
| g <sup>-</sup>    |                    |                    | 1.361   | 122.4            | 117.9        | -0.7       |
| t                 | t                  | (t-c) <sup>-</sup> | 1.352   | 121.5            | 116.7        | -0.3       |
| g <sup>+</sup>    |                    |                    | 1.361   | 122.4            | 117.9        | 0.7        |
| g <sup>-</sup>    |                    |                    | 1.361   | 122.4            | 117.9        | 0.7        |
| t                 | t                  | (c-t) <sup>+</sup> |         |                  |              |            |
| g <sup>+</sup>    |                    |                    | 1.361   | 122.4            | 119.1        | 0.2        |
| g <sup>-</sup>    |                    |                    | 1.361   | 122.4            | 119.1        | 0.2        |
| t                 | t                  | (c-t) <sup>-</sup> |         |                  |              |            |
| g <sup>+</sup>    |                    |                    | 1.361   | 122.4            | 119.1        | -0.2       |
| g <sup>-</sup>    |                    |                    | 1.361   | 122.4            | 119.1        | -0.2       |
| t                 | t                  | c-c                | 1.352   | 121.5            | 116.7        | 1.0        |
| g <sup>+</sup>    |                    |                    | 1.362   | 122.3            | 119.1        | -2.3       |
| g <sup>-</sup>    |                    |                    | 1.362   | 122.3            | 119.1        | 2.3        |
| bond b            |                    |                    |         |                  |              |            |
| t                 | t-t                | t                  | 5.811   | 116.8            | 116.8        | 0.0        |
|                   | (t-c) <sup>+</sup> |                    | 5.811   | 116.7            | 116.7        | 53.6       |
|                   | (t-c) <sup>-</sup> |                    | 5.811   | 116.7            | 116.7        | -53.6      |
|                   | (c-t) <sup>+</sup> |                    | 5.809   | 116.8            | 116.8        | 123.0      |
|                   | (c-t) <sup>-</sup> |                    | 5.809   | 116.8            | 116.8        | -123.0     |
|                   | c-c                |                    | 5.809   | 116.7            | 116.7        | 180.0      |
| bond d (f)        |                    |                    |         |                  |              |            |
| t                 | t                  | t                  |         |                  |              |            |
|                   | g <sup>+</sup>     |                    | 1.453   | 123.2            | 112.3        | 87.7       |
|                   | g <sup>-</sup>     |                    | 1.453   | 123.2            | 112.3        | -87.7      |
|                   | t                  | g <sup>+</sup>     | 1.457   | 122.1            | 111.1        | 3.3        |
|                   | g <sup>+</sup>     |                    | 1.456   | 122.9            | 113.7        | 94.1       |
|                   | g <sup>-</sup>     |                    | 1.462   | 123.2            | 114.6        | -93.8      |
|                   | t                  | g <sup>-</sup>     | 1.457   | 122.1            | 111.1        | -3.3       |
|                   | g <sup>+</sup>     |                    | 1.462   | 123.2            | 114.6        | 93.8       |
|                   | g <sup>-</sup>     |                    | 1.456   | 122.9            | 113.7        | -94.1      |

| conformation      |                |                |         |                  |              |            |
|-------------------|----------------|----------------|---------|------------------|--------------|------------|
| bond <sup>a</sup> |                |                | $l_j^b$ | $\theta_{j-1}^c$ | $\theta_j^d$ | $\phi_j^e$ |
| $j-1$             | $j$            | $j+1$          |         |                  |              |            |
| bond e            |                |                |         |                  |              |            |
| t                 | t              | t              |         |                  |              |            |
|                   | g <sup>+</sup> |                |         |                  |              |            |
|                   | g <sup>-</sup> |                |         |                  |              |            |
| g <sup>+</sup>    | t              |                |         |                  |              |            |
|                   | g <sup>+</sup> |                | 1.525   |                  | 111.1        | -112.7     |
|                   | g <sup>-</sup> |                |         |                  |              |            |
| g <sup>-</sup>    | t              |                |         |                  |              |            |
|                   | g <sup>+</sup> |                | 1.525   |                  | 111.1        | 112.7      |
|                   | g <sup>-</sup> |                |         |                  |              |            |
| t                 | t              | g <sup>+</sup> |         |                  |              |            |
|                   | g <sup>+</sup> |                |         |                  |              |            |
|                   | g <sup>-</sup> |                | 1.525   |                  | 114.6        | -112.7     |
| g <sup>+</sup>    | t              |                | 1.538   |                  | 112.3        | 2.5        |
|                   | g <sup>+</sup> |                | 1.534   |                  | 113.7        | 116.8      |
|                   | g <sup>-</sup> |                | 1.532   |                  | 113.6        | -119.0     |
| g <sup>-</sup>    | t              |                | 1.538   |                  | 112.1        | 0.5        |
|                   | g <sup>+</sup> |                | 1.533   |                  | 113.7        | 116.7      |
|                   | g <sup>-</sup> |                | 1.533   |                  | 113.0        | -116.7     |
| t                 | t              | g <sup>-</sup> |         |                  |              |            |
|                   | g <sup>+</sup> |                | 1.525   |                  | 114.6        | 112.7      |
|                   | g <sup>-</sup> |                |         |                  |              |            |
| g <sup>+</sup>    | t              |                | 1.538   |                  | 112.1        | 0.5        |
|                   | g <sup>+</sup> |                | 1.533   |                  | 113.0        | 116.7      |
|                   | g <sup>-</sup> |                | 1.533   |                  | 113.7        | -116.7     |
| g <sup>-</sup>    | t              |                | 1.538   |                  | 112.3        | -2.5       |
|                   | g <sup>+</sup> |                | 1.532   |                  | 113.6        | 119.0      |
|                   | g <sup>-</sup> |                | 1.534   |                  | 113.7        | -116.8     |

<sup>a</sup> $j$  denotes the current bond. The blank line represents that the conformation is inexistent. <sup>b</sup>Length of bond  $j$  in Å. <sup>c</sup>Angle formed between bonds  $j-1$  and  $j$  in deg. <sup>d</sup>Angle formed between bonds  $j$  and  $j+1$  in deg. <sup>e</sup>Dihedral angle of bond  $j$  in deg.



**Table S2** Geometrical parameters of PTA2T, used in the refined RIS calculations

| conformation      |                    |                    |         |                  |              |            |
|-------------------|--------------------|--------------------|---------|------------------|--------------|------------|
| bond <sup>a</sup> |                    |                    | $l_j^b$ | $\theta_{j-1}^c$ | $\theta_j^d$ | $\phi_j^e$ |
| $j-1$             | $j$                | $j+1$              |         |                  |              |            |
| bond a (c)        |                    |                    |         |                  |              |            |
| t                 | t                  | t-t                | 1.336   | 124.3            | 115.4        | 1.8        |
| g <sup>+</sup>    |                    |                    | 1.342   | 126.2            | 114.8        | 3.5        |
| g <sup>-</sup>    |                    |                    | 1.342   | 126.2            | 114.8        | -3.5       |
| t                 | t                  | (t-c) <sup>+</sup> | 1.336   | 124.6            | 115.5        | 2.8        |
| g <sup>+</sup>    |                    |                    | 1.341   | 126.4            | 114.4        | 3.0        |
| g <sup>-</sup>    |                    |                    | 1.341   | 126.4            | 114.4        | 3.0        |
|                   | t                  | (t-c) <sup>-</sup> | 1.336   | 124.6            | 115.5        | -2.8       |
| g <sup>+</sup>    |                    |                    | 1.341   | 126.4            | 114.4        | -3.0       |
| g <sup>-</sup>    |                    |                    | 1.341   | 126.4            | 114.4        | -3.0       |
| t                 | t                  | (c-t) <sup>+</sup> | 1.335   | 124.6            | 115.6        | -2.4       |
| g <sup>+</sup>    |                    |                    | 1.341   | 126.3            | 114.8        | -2.9       |
| g <sup>-</sup>    |                    |                    | 1.341   | 126.3            | 114.8        | -2.9       |
| t                 | t                  | (c-t) <sup>-</sup> | 1.335   | 124.6            | 115.6        | 2.4        |
| g <sup>+</sup>    |                    |                    | 1.341   | 126.3            | 114.8        | 2.9        |
| g <sup>-</sup>    |                    |                    | 1.341   | 126.3            | 114.8        | 2.9        |
| t                 | t                  | c-c                | 1.337   | 124.3            | 115.8        | 1.7        |
| g <sup>+</sup>    |                    |                    | 1.342   | 126.2            | 114.9        | 3.7        |
| g <sup>-</sup>    |                    |                    | 1.342   | 126.2            | 114.9        | -3.7       |
| bond b            |                    |                    |         |                  |              |            |
| t                 | t-t                | t                  | 5.793   | 115.4            | 115.4        | 0.0        |
|                   | (t-c) <sup>+</sup> |                    | 5.794   | 115.5            | 115.5        | 79.6       |
|                   | (t-c) <sup>-</sup> |                    | 5.794   | 115.5            | 115.5        | -79.6      |
|                   | (c-t) <sup>+</sup> |                    | 5.792   | 115.6            | 115.6        | 98.0       |
|                   | (c-t) <sup>-</sup> |                    | 5.792   | 115.6            | 115.6        | -98.0      |
|                   | c-c                |                    | 5.792   | 115.8            | 115.8        | 180.0      |
| bond d (f)        |                    |                    |         |                  |              |            |
| t                 | t                  | t                  | 1.456   | 125.3            | 109.7        | -9.3       |
|                   | g <sup>+</sup>     |                    | 1.454   | 126.2            | 111.5        | 89.9       |
|                   | g <sup>-</sup>     |                    | 1.454   | 126.2            | 111.5        | -89.9      |
|                   | t                  | g <sup>+</sup>     | 1.458   | 124.6            | 111.8        | 0.2        |
|                   | g <sup>+</sup>     |                    | 1.457   | 126.2            | 113.6        | 93.1       |
|                   | g <sup>-</sup>     |                    | 1.461   | 126.8            | 114.2        | -81.8      |
|                   | t                  | g <sup>-</sup>     | 1.458   | 124.6            | 111.8        | -0.2       |
|                   | g <sup>+</sup>     |                    | 1.461   | 126.8            | 114.2        | 81.8       |
|                   | g <sup>-</sup>     |                    | 1.457   | 126.2            | 113.6        | -93.1      |

| conformation      |                |                |         |                  |              |            |
|-------------------|----------------|----------------|---------|------------------|--------------|------------|
| bond <sup>a</sup> |                |                | $l_j^b$ | $\theta_{j-1}^c$ | $\theta_j^d$ | $\phi_j^e$ |
| $j-1$             | $j$            | $j+1$          |         |                  |              |            |
| bond e            |                |                |         |                  |              |            |
| t                 | t              | t              | 1.526   |                  | 109.6        | 0.4        |
|                   | g <sup>+</sup> |                | 1.520   |                  | 111.7        | 111.5      |
|                   | g <sup>-</sup> |                | 1.520   |                  | 111.7        | -111.5     |
| g <sup>+</sup>    | t              |                | 1.531   |                  | 109.7        | -1.5       |
|                   | g <sup>+</sup> |                | 1.530   |                  | 112.1        | 113.8      |
|                   | g <sup>-</sup> |                | 1.525   |                  | 111.8        | -112.1     |
| g <sup>-</sup>    | t              |                | 1.531   |                  | 109.7        | 1.5        |
|                   | g <sup>+</sup> |                | 1.525   |                  | 111.8        | 112.1      |
|                   | g <sup>-</sup> |                | 1.530   |                  | 112.1        | -113.8     |
| t                 | t              | g <sup>+</sup> | 1.531   |                  | 111.6        | -1.5       |
|                   | g <sup>+</sup> |                | 1.530   |                  | 113.5        | 113.8      |
|                   | g <sup>-</sup> |                | 1.525   |                  | 114.2        | -112.1     |
| g <sup>+</sup>    | t              |                | 1.539   |                  | 111.6        | 9.8        |
|                   | g <sup>+</sup> |                | 1.533   |                  | 113.6        | 116.8      |
|                   | g <sup>-</sup> |                |         |                  |              |            |
| g <sup>-</sup>    | t              |                | 1.538   |                  | 111.5        | -0.7       |
|                   | g <sup>+</sup> |                |         |                  |              |            |
|                   | g <sup>-</sup> |                |         |                  |              |            |
| t                 | t              | g <sup>-</sup> | 1.531   |                  | 111.6        | 1.5        |
|                   | g <sup>+</sup> |                | 1.525   |                  | 114.2        | 112.1      |
|                   | g <sup>-</sup> |                | 1.530   |                  | 113.5        | -113.8     |
| g <sup>+</sup>    | t              |                | 1.538   |                  | 111.5        | 0.7        |
|                   | g <sup>+</sup> |                |         |                  |              |            |
|                   | g <sup>-</sup> |                |         |                  |              |            |
| g <sup>-</sup>    | t              |                | 1.539   |                  | 111.6        | -9.8       |
|                   | g <sup>+</sup> |                |         |                  |              |            |
|                   | g <sup>-</sup> |                | 1.533   |                  | 113.6        | -116.8     |

<sup>a</sup> $j$  denotes the current bond. The blank line represents that the conformation is inexistent. <sup>b</sup>Length of bond  $j$  in Å. <sup>c</sup>Angle formed between bonds  $j-1$  and  $j$  in deg. <sup>d</sup>Angle formed between bonds  $j$  and  $j+1$  in deg. <sup>e</sup>Dihedral angle of bond  $j$  in deg.

**Table S3** Geometrical parameters of PA3T, used in the refined RIS calculations

| conformation      |                    |                    |         |                  |              |            |
|-------------------|--------------------|--------------------|---------|------------------|--------------|------------|
| bond <sup>a</sup> |                    |                    | $l_j^b$ | $\theta_{j-1}^c$ | $\theta_j^d$ | $\phi_j^e$ |
| $j-1$             | $j$                | $j+1$              |         |                  |              |            |
| bond a (c)        |                    |                    |         |                  |              |            |
| t                 | t                  | t-t                |         |                  |              |            |
| g <sup>+</sup>    |                    |                    | 1.360   | 123.4            | 117.6        | -0.6       |
| g <sup>-</sup>    |                    |                    | 1.360   | 123.4            | 117.6        | 0.6        |
| t                 | t                  | (t-c) <sup>+</sup> |         |                  |              |            |
| g <sup>+</sup>    |                    |                    | 1.360   | 122.3            | 117.9        | -1.8       |
| g <sup>-</sup>    |                    |                    | 1.360   | 122.3            | 117.9        | -1.8       |
| t                 | t                  | (t-c) <sup>-</sup> |         |                  |              |            |
| g <sup>+</sup>    |                    |                    | 1.360   | 122.3            | 117.9        | 1.8        |
| g <sup>-</sup>    |                    |                    | 1.360   | 122.3            | 117.9        | 1.8        |
| t                 | t                  | (c-t) <sup>+</sup> |         |                  |              |            |
| g <sup>+</sup>    |                    |                    | 1.359   | 122.7            | 119.3        | -1.6       |
| g <sup>-</sup>    |                    |                    | 1.359   | 122.7            | 119.3        | -1.6       |
| t                 | t                  | (c-t) <sup>-</sup> |         |                  |              |            |
| g <sup>+</sup>    |                    |                    | 1.359   | 122.7            | 119.3        | 1.6        |
| g <sup>-</sup>    |                    |                    | 1.359   | 122.7            | 119.3        | 1.6        |
| t                 | t                  | c-c                |         |                  |              |            |
| g <sup>+</sup>    |                    |                    | 1.359   | 122.8            | 119.1        | -1.6       |
| g <sup>-</sup>    |                    |                    | 1.359   | 122.8            | 119.1        | 1.6        |
| bond b            |                    |                    |         |                  |              |            |
| t                 | t-t                | t                  | 5.825   | 118.1            | 118.1        | 0.0        |
|                   | (t-c) <sup>+</sup> |                    | 5.824   | 118.0            | 118.0        | 46.9       |
|                   | (t-c) <sup>-</sup> |                    | 5.824   | 118.0            | 118.0        | -46.9      |
|                   | (c-t) <sup>+</sup> |                    | 5.823   | 119.4            | 119.4        | 129.2      |
|                   | (c-t) <sup>-</sup> |                    | 5.823   | 119.4            | 119.4        | -129.2     |
|                   | c-c                |                    | 5.822   | 119.2            | 119.2        | 180.0      |
| bond d (g)        |                    |                    |         |                  |              |            |
| t                 | t                  | t                  | 1.458   | 122.6            | 110.9        | -19.0      |
|                   | g <sup>+</sup>     |                    | 1.457   | 123.3            | 113.1        | 88.8       |
|                   | g <sup>-</sup>     |                    | 1.457   | 123.3            | 113.1        | -88.8      |
| t                 | t                  | g <sup>+</sup>     |         |                  |              |            |
| g <sup>+</sup>    |                    |                    | 1.456   | 123.8            | 113.6        | 76.9       |
| g <sup>-</sup>    |                    |                    | 1.461   | 123.5            | 113.3        | -34.8      |
| t                 | t                  | g <sup>-</sup>     |         |                  |              |            |
| g <sup>+</sup>    |                    |                    | 1.461   | 123.5            | 113.3        | 34.8       |
| g <sup>-</sup>    |                    |                    | 1.456   | 123.8            | 113.6        | -76.9      |

| conformation      |                |                |         |                  |              |            |
|-------------------|----------------|----------------|---------|------------------|--------------|------------|
| bond <sup>a</sup> |                |                | $l_j^b$ | $\theta_{j-1}^c$ | $\theta_j^d$ | $\phi_j^e$ |
| $j-1$             | $j$            | $j+1$          |         |                  |              |            |
| bond e (f)        |                |                |         |                  |              |            |
| t                 | t              | t              | 1.526   | 110.9            | 111.1        | -1.0       |
|                   | g <sup>+</sup> |                | 1.530   | 112.6            | 113.1        | 113.1      |
|                   | g <sup>-</sup> |                | 1.530   | 112.6            | 113.1        | -113.1     |
| g <sup>+</sup>    | t              |                | 1.532   | 113.1            | 111.4        | 1.1        |
|                   | g <sup>+</sup> |                | 1.532   | 114.0            | 113.2        | 114.1      |
|                   | g <sup>-</sup> |                | 1.531   | 113.8            | 113.3        | -113.7     |
| g <sup>-</sup>    | t              |                | 1.532   | 113.1            | 111.4        | -1.1       |
|                   | g <sup>+</sup> |                | 1.531   | 113.8            | 113.3        | 113.7      |
|                   | g <sup>-</sup> |                | 1.532   | 114.0            | 113.2        | -114.1     |
| t                 | t              | g <sup>+</sup> | 1.527   | 111.1            | 113.3        | -2.0       |
|                   | g <sup>+</sup> |                | 1.529   | 112.3            | 114.8        | 114.2      |
|                   | g <sup>-</sup> |                | 1.528   | 113.2            | 115.7        | -109.4     |
| g <sup>+</sup>    | t              |                | 1.532   | 112.7            | 113.2        | 0.5        |
|                   | g <sup>+</sup> |                | 1.533   | 113.6            | 114.9        | 124.4      |
|                   | g <sup>-</sup> |                | 1.528   | 113.3            | 115.7        | -113.3     |
| g <sup>-</sup>    | t              |                | 1.532   | 113.0            | 113.0        | -2.6       |
|                   | g <sup>+</sup> |                | 1.530   | 112.5            | 114.8        | 114.5      |
|                   | g <sup>-</sup> |                | 1.534   | 115.1            | 115.7        | -105.4     |
| t                 | t              | g <sup>-</sup> | 1.527   | 111.1            | 113.3        | 2.0        |
|                   | g <sup>+</sup> |                | 1.528   | 113.2            | 115.7        | 109.4      |
|                   | g <sup>-</sup> |                | 1.529   | 112.3            | 114.8        | -114.2     |
| g <sup>+</sup>    | t              |                | 1.532   | 113.0            | 113.0        | 2.6        |
|                   | g <sup>+</sup> |                | 1.534   | 115.1            | 115.7        | 105.4      |
|                   | g <sup>-</sup> |                | 1.530   | 112.5            | 114.8        | -114.5     |
| g <sup>-</sup>    | t              |                | 1.532   | 112.7            | 113.2        | -0.5       |
|                   | g <sup>+</sup> |                | 1.528   | 113.3            | 115.7        | 113.3      |
|                   | g <sup>-</sup> |                | 1.533   | 113.6            | 114.9        | -124.4     |

<sup>a</sup>  $j$  denotes the current bond. The blank line represents that the conformation is inexistent. <sup>b</sup> Length of bond  $j$  in Å. <sup>c</sup> Angle formed between bonds  $j-1$  and  $j$  in deg. <sup>d</sup> Angle formed between bonds  $j$  and  $j+1$  in deg. <sup>e</sup> Dihedral angle of bond  $j$  in deg.

**Table S4** Geometrical parameters of PTA3T, used in the refined RIS calculations

| conformation      |                    |                    |         |                  |              |            |
|-------------------|--------------------|--------------------|---------|------------------|--------------|------------|
| bond <sup>a</sup> |                    |                    | $l_j^b$ | $\theta_{j-1}^c$ | $\theta_j^d$ | $\phi_j^e$ |
| $j-1$             | $j$                | $j+1$              |         |                  |              |            |
| bond a (c)        |                    |                    |         |                  |              |            |
| t                 | t                  | t-t                | 1.338   | 125.3            | 115.1        | 2.4        |
| g <sup>+</sup>    |                    |                    | 1.339   | 126.6            | 114.6        | 2.1        |
| g <sup>-</sup>    |                    |                    | 1.339   | 126.6            | 114.6        | -2.1       |
| t                 | t                  | (t-c) <sup>+</sup> | 1.338   | 125.3            | 115.2        | 2.5        |
| g <sup>+</sup>    |                    |                    | 1.339   | 126.6            | 114.5        | 3.9        |
| g <sup>-</sup>    |                    |                    | 1.339   | 126.6            | 114.5        | 3.9        |
| t                 | t                  | (t-c) <sup>-</sup> | 1.338   | 125.3            | 115.2        | -2.5       |
| g <sup>+</sup>    |                    |                    | 1.339   | 126.6            | 114.5        | -3.9       |
| g <sup>-</sup>    |                    |                    | 1.339   | 126.6            | 114.5        | -3.9       |
| t                 | t                  | (c-t) <sup>+</sup> | 1.338   | 125.3            | 115.3        | -2.0       |
| g <sup>+</sup>    |                    |                    | 1.339   | 126.6            | 114.6        | -1.8       |
| g <sup>-</sup>    |                    |                    | 1.339   | 126.6            | 114.6        | -1.8       |
| t                 | t                  | (c-t) <sup>-</sup> | 1.338   | 125.3            | 115.3        | 2.0        |
| g <sup>+</sup>    |                    |                    | 1.339   | 126.6            | 114.6        | 1.8        |
| g <sup>-</sup>    |                    |                    | 1.339   | 126.6            | 114.6        | 1.8        |
| t                 | t                  | c-c                | 1.338   | 125.4            | 115.1        | 2.2        |
| g <sup>+</sup>    |                    |                    | 1.339   | 126.6            | 114.5        | 1.7        |
| g <sup>-</sup>    |                    |                    | 1.339   | 126.6            | 114.5        | -1.7       |
| bond b            |                    |                    |         |                  |              |            |
| t                 | t-t                | t                  | 5.809   | 115.1            | 115.1        | 0.0        |
|                   | (t-c) <sup>+</sup> |                    | 5.809   | 115.2            | 115.2        | 75.8       |
|                   | (t-c) <sup>-</sup> |                    | 5.809   | 115.2            | 115.2        | -75.8      |
|                   | (c-t) <sup>+</sup> |                    | 5.808   | 115.3            | 115.3        | 102.5      |
|                   | (c-t) <sup>-</sup> |                    | 5.808   | 115.3            | 115.3        | -102.5     |
|                   | c-c                |                    | 5.808   | 115.1            | 115.1        | 180.0      |
| bond d (g)        |                    |                    |         |                  |              |            |
| t                 | t                  | t                  | 1.458   | 125.4            | 110.5        | 6.2        |
|                   | g <sup>+</sup>     |                    | 1.458   | 126.4            | 112.3        | 88.9       |
|                   | g <sup>-</sup>     |                    | 1.458   | 126.4            | 112.3        | -88.9      |
|                   | t                  | g <sup>+</sup>     | 1.461   | 125.6            | 111.6        | -9.9       |
|                   | g <sup>+</sup>     |                    | 1.461   | 126.1            | 114.0        | 112.7      |
|                   | g <sup>-</sup>     |                    | 1.460   | 127.4            | 112.5        | -59.0      |
|                   | t                  | g <sup>-</sup>     | 1.461   | 125.6            | 111.6        | 9.9        |
|                   | g <sup>+</sup>     |                    | 1.460   | 127.4            | 112.5        | 59.0       |
|                   | g <sup>-</sup>     |                    | 1.461   | 126.1            | 114.0        | -112.7     |

| conformation      |                |                |         |                  |              |            |
|-------------------|----------------|----------------|---------|------------------|--------------|------------|
| bond <sup>a</sup> |                |                | $l_j^b$ | $\theta_{j-1}^c$ | $\theta_j^d$ | $\phi_j^e$ |
| $j-1$             | $j$            | $j+1$          |         |                  |              |            |
| bond e (f)        |                |                |         |                  |              |            |
| t                 | t              | t              | 1.525   | 110.5            | 110.7        | -0.6       |
|                   | g <sup>+</sup> |                | 1.525   | 111.6            | 113.1        | 109.8      |
|                   | g <sup>-</sup> |                | 1.525   | 111.6            | 113.1        | -109.8     |
| g <sup>+</sup>    | t              |                | 1.532   | 112.6            | 110.8        | -0.3       |
|                   | g <sup>+</sup> |                | 1.532   | 114.0            | 113.1        | 112.7      |
|                   | g <sup>-</sup> |                | 1.530   | 112.5            | 113.0        | -113.0     |
| g <sup>-</sup>    | t              |                | 1.532   | 112.6            | 110.8        | 0.3        |
|                   | g <sup>+</sup> |                | 1.530   | 112.5            | 113.0        | 113.0      |
|                   | g <sup>-</sup> |                | 1.532   | 114.0            | 113.1        | -112.7     |
| t                 | t              | g <sup>+</sup> | 1.528   | 110.4            | 113.1        | 0.4        |
|                   | g <sup>+</sup> |                | 1.528   | 111.4            | 115.1        | 110.7      |
|                   | g <sup>-</sup> |                | 1.535   | 113.4            | 116.1        | -91.1      |
| g <sup>+</sup>    | t              |                | 1.535   | 112.3            | 113.0        | -8.2       |
|                   | g <sup>+</sup> |                | 1.534   | 113.8            | 115.3        | 115.2      |
|                   | g <sup>-</sup> |                | 1.535   | 113.4            | 116.1        | -91.1      |
| g <sup>-</sup>    | t              |                | 1.533   | 112.4            | 113.2        | -1.0       |
|                   | g <sup>+</sup> |                |         |                  |              |            |
|                   | g <sup>-</sup> |                | 1.533   | 115.3            | 116.0        | -110.4     |
| t                 | t              | g <sup>-</sup> | 1.528   | 110.4            | 113.1        | -0.4       |
|                   | g <sup>+</sup> |                | 1.535   | 113.4            | 116.1        | 91.1       |
|                   | g <sup>-</sup> |                | 1.528   | 111.4            | 115.1        | -110.7     |
| g <sup>+</sup>    | t              |                | 1.533   | 112.4            | 113.2        | 1.0        |
|                   | g <sup>+</sup> |                | 1.533   | 115.3            | 116.0        | 110.4      |
|                   | g <sup>-</sup> |                |         |                  |              |            |
| g <sup>-</sup>    | t              |                | 1.535   | 112.3            | 113.0        | 8.2        |
|                   | g <sup>+</sup> |                | 1.535   | 113.4            | 116.1        | 91.1       |
|                   | g <sup>-</sup> |                | 1.534   | 113.8            | 115.3        | -115.2     |

<sup>a</sup>  $j$  denotes the current bond. The blank line represents that the conformation is inexistent. <sup>b</sup> Length of bond  $j$  in Å. <sup>c</sup> Angle formed between bonds  $j-1$  and  $j$  in deg. <sup>d</sup> Angle formed between bonds  $j$  and  $j+1$  in deg. <sup>e</sup> Dihedral angle of bond  $j$  in deg.

**Table S5** Geometrical parameters of P3TS<sub>2</sub>, used in the refined RIS calculations

| conformation   |                |                | $l_j^b$ | $\theta_{j-1}^c$ | $\theta_j^d$ | $\phi_j^e$ |
|----------------|----------------|----------------|---------|------------------|--------------|------------|
| $j-1$          | $j$            | $j+1$          |         |                  |              |            |
| bond a (c)     |                |                |         |                  |              |            |
| t              | t              | trans          | 1.807   | 98.4             | 117.9        | 0.0        |
| g <sup>+</sup> |                |                | 1.809   | 99.0             | 117.7        | 0.2        |
| g <sup>-</sup> |                |                | 1.809   | 99.0             | 117.7        | -0.2       |
| t              | t              | cis            | 1.808   | 98.5             | 118.8        | 0.0        |
| g <sup>+</sup> |                |                | 1.804   | 99.6             | 118.6        | -0.1       |
| g <sup>-</sup> |                |                | 1.804   | 99.6             | 118.6        | 0.1        |
| bond b         |                |                |         |                  |              |            |
| t              | trans          | t              | 5.798   | 117.9            | 117.9        | 0.0        |
|                | cis            |                | 5.787   | 118.8            | 118.8        | 180.0      |
| bond d (g)     |                |                |         |                  |              |            |
| t              | t              | t              | 1.838   | 98.4             | 109.7        | 0.0        |
|                | g <sup>+</sup> |                | 1.835   | 98.9             | 113.5        | 97.4       |
|                | g <sup>-</sup> |                | 1.835   | 98.9             | 113.5        | -97.4      |
|                | t              | g <sup>+</sup> | 1.841   | 98.6             | 111.4        | -12.6      |
|                | g <sup>+</sup> |                | 1.838   | 98.7             | 114.7        | 96.9       |
|                | g <sup>-</sup> |                | 1.838   | 100.0            | 115.1        | -81.1      |
|                | t              | g <sup>-</sup> | 1.841   | 98.6             | 111.4        | 12.6       |
|                | g <sup>+</sup> |                | 1.838   | 100.0            | 115.1        | 81.1       |
|                | g <sup>-</sup> |                | 1.838   | 98.7             | 114.7        | -96.9      |

| conformation    |                |                 | $l_j^b$ | $\theta_{j-1}^c$ | $\theta_j^d$ | $\phi_j^e$ |
|-----------------|----------------|-----------------|---------|------------------|--------------|------------|
| $j-1$           | $j$            | $j+1$           |         |                  |              |            |
| bond e (f)      |                |                 |         |                  |              |            |
| t               | t              | t               | 1.532   | 109.7            | 110.3        | 0.0        |
|                 | g <sup>+</sup> |                 | 1.534   | 111.4            | 113.3        | 111.8      |
|                 | g <sup>-</sup> |                 | 1.534   | 111.4            | 113.3        | -111.8     |
| σg <sup>+</sup> | t              |                 | 1.532   | 113.5            | 110.5        | -1.6       |
|                 | g <sup>+</sup> |                 | 1.533   | 114.7            | 113.1        | 113.4      |
|                 | g <sup>-</sup> |                 | 1.535   | 115.1            | 113.6        | -114.2     |
| σg <sup>-</sup> | t              |                 | 1.532   | 113.5            | 110.5        | 1.6        |
|                 | g <sup>+</sup> |                 | 1.535   | 115.1            | 113.6        | 114.2      |
|                 | g <sup>-</sup> |                 | 1.533   | 114.7            | 113.1        | -113.4     |
| t               | t              | σg <sup>+</sup> | 1.530   | 109.6            | 113.1        | -0.1       |
|                 | g <sup>+</sup> |                 | 1.532   | 111.0            | 116.0        | 114.2      |
|                 | g <sup>-</sup> |                 | 1.533   | 115.9            | 116.5        | -92.7      |
| σg <sup>+</sup> | t              |                 | 1.528   | 113.6            | 113.4        | 6.2        |
|                 | g <sup>+</sup> |                 | 1.533   | 114.0            | 115.2        | 107.4      |
|                 | g <sup>-</sup> |                 | 1.534   | 117.1            | 116.8        | -105.2     |
| σg <sup>-</sup> | t              |                 | 1.530   | 113.3            | 113.2        | -0.3       |
|                 | g <sup>+</sup> |                 | 1.533   | 114.0            | 115.2        | 107.4      |
|                 | g <sup>-</sup> |                 | 1.536   | 116.1            | 116.8        | -96.4      |
| t               | t              | σg <sup>-</sup> | 1.530   | 109.6            | 113.1        | 0.1        |
|                 | g <sup>+</sup> |                 | 1.533   | 115.9            | 116.5        | 92.7       |
|                 | g <sup>-</sup> |                 | 1.532   | 111.0            | 116.0        | -114.2     |
| σg <sup>+</sup> | t              |                 | 1.530   | 113.3            | 113.2        | 0.3        |
|                 | g <sup>+</sup> |                 | 1.536   | 116.1            | 116.8        | 96.4       |
|                 | g <sup>-</sup> |                 | 1.533   | 114.0            | 115.2        | -107.4     |
| σg <sup>-</sup> | t              |                 | 1.528   | 113.6            | 113.4        | -6.2       |
|                 | g <sup>+</sup> |                 | 1.534   | 117.1            | 116.8        | 105.2      |
|                 | g <sup>-</sup> |                 | 1.533   | 114.0            | 115.2        | -107.4     |

<sup>a</sup> $j$  denotes the current bond. The blank line represents that the conformation is inexistent. <sup>b</sup>Length of bond  $j$  in Å. <sup>c</sup>Angle formed between bonds  $j-1$  and  $j$  in deg. <sup>d</sup>Angle formed between bonds  $j$  and  $j+1$  in deg. <sup>e</sup>Dihedral angle of bond  $j$  in deg.

**Table S6** Geometrical parameters of P3TS<sub>4</sub>, used in the refined RIS calculations

| conformation      |                    |                    |         |                  |              |            |
|-------------------|--------------------|--------------------|---------|------------------|--------------|------------|
| bond <sup>a</sup> |                    |                    | $l_j^b$ | $\theta_{j-1}^c$ | $\theta_j^d$ | $\phi_j^e$ |
| $j-1$             | $j$                | $j+1$              |         |                  |              |            |
| bond a (c)        |                    |                    |         |                  |              |            |
| t                 | t                  | t-t                | 1.758   | 103.9            | 113.0        | 3.1        |
| g <sup>+</sup>    |                    |                    | 1.770   | 104.7            | 112.7        | 2.1        |
| g <sup>-</sup>    |                    |                    | 1.770   | 104.7            | 112.7        | -2.1       |
| t                 | t                  | (t-c) <sup>+</sup> | 1.759   | 103.9            | 113.2        | 4.0        |
| g <sup>+</sup>    |                    |                    | 1.772   | 104.2            | 112.1        | 5.9        |
| g <sup>-</sup>    |                    |                    | 1.772   | 104.2            | 112.1        | 5.9        |
| t                 | t                  | (t-c) <sup>-</sup> | 1.759   | 103.9            | 113.2        | -4.0       |
| g <sup>+</sup>    |                    |                    | 1.772   | 104.2            | 112.1        | -5.9       |
| g <sup>-</sup>    |                    |                    | 1.772   | 104.2            | 112.1        | -5.9       |
| t                 | t                  | (c-t) <sup>+</sup> | 1.758   | 103.9            | 113.4        | -3.1       |
| g <sup>+</sup>    |                    |                    | 1.771   | 104.7            | 113.0        | -5.5       |
| g <sup>-</sup>    |                    |                    | 1.771   | 104.7            | 113.0        | -5.5       |
| t                 | t                  | (c-t) <sup>-</sup> | 1.758   | 103.9            | 113.4        | 3.1        |
| g <sup>+</sup>    |                    |                    | 1.771   | 104.7            | 113.0        | 5.5        |
| g <sup>-</sup>    |                    |                    | 1.771   | 104.7            | 113.0        | 5.5        |
| t                 | t                  | c-c                | 1.759   | 103.8            | 113.3        | -3.1       |
| g <sup>+</sup>    |                    |                    | 1.771   | 104.7            | 112.9        | 2.0        |
| g <sup>-</sup>    |                    |                    | 1.771   | 104.7            | 112.9        | -2.0       |
| bond b            |                    |                    |         |                  |              |            |
| t                 | t-t                | t                  | 5.789   | 113.0            | 113.0        | 0.0        |
|                   | (t-c) <sup>+</sup> |                    | 5.789   | 113.2            | 113.2        | 70.8       |
|                   | (t-c) <sup>-</sup> |                    | 5.789   | 113.2            | 113.2        | -70.8      |
|                   | (c-t) <sup>+</sup> |                    | 5.787   | 113.4            | 113.4        | 106.3      |
|                   | (c-t) <sup>-</sup> |                    | 5.787   | 113.4            | 113.4        | -106.3     |
|                   | c-c                |                    | 5.788   | 113.3            | 113.3        | 180.0      |
| bond d (g)        |                    |                    |         |                  |              |            |
| t                 | t                  | t                  | 1.831   | 103.6            | 109.1        | 3.7        |
|                   | g <sup>+</sup>     |                    | 1.830   | 104.4            | 113.5        | 96.9       |
|                   | g <sup>-</sup>     |                    | 1.830   | 104.4            | 113.5        | -96.9      |
|                   | t                  | g <sup>+</sup>     | 1.834   | 103.5            | 110.7        | 1.3        |
|                   | g <sup>+</sup>     |                    | 1.833   | 104.2            | 114.8        | 96.0       |
|                   | g <sup>-</sup>     |                    | 1.835   | 105.4            | 113.7        | -68.8      |
|                   | t                  | g <sup>-</sup>     | 1.834   | 103.5            | 110.7        | -1.3       |
|                   | g <sup>+</sup>     |                    | 1.835   | 105.4            | 113.7        | 68.8       |
|                   | g <sup>-</sup>     |                    | 1.833   | 104.2            | 114.8        | -96.0      |

| conformation      |                |                |         |                  |              |            |
|-------------------|----------------|----------------|---------|------------------|--------------|------------|
| bond <sup>a</sup> |                |                | $l_j^b$ | $\theta_{j-1}^c$ | $\theta_j^d$ | $\phi_j^e$ |
| $j-1$             | $j$            | $j+1$          |         |                  |              |            |
| bond e (f)        |                |                |         |                  |              |            |
| t                 | t              | t              | 1.534   | 109.1            | 110.1        | -0.8       |
|                   | g <sup>+</sup> |                | 1.535   | 110.7            | 113.2        | 112.6      |
|                   | g <sup>-</sup> |                | 1.535   | 110.7            | 113.2        | -112.6     |
| g <sup>+</sup>    | t              |                | 1.533   | 113.5            | 110.2        | 1.5        |
|                   | g <sup>+</sup> |                | 1.535   | 114.8            | 112.6        | 113.2      |
|                   | g <sup>-</sup> |                | 1.536   | 113.7            | 113.2        | -112.5     |
| g <sup>-</sup>    | t              |                | 1.533   | 113.5            | 110.2        | -1.5       |
|                   | g <sup>+</sup> |                | 1.536   | 113.7            | 113.2        | 112.5      |
|                   | g <sup>-</sup> |                | 1.535   | 114.8            | 112.6        | -113.2     |
| t                 | t              | g <sup>+</sup> | 1.534   | 109.1            | 113.2        | 4.3        |
|                   | g <sup>+</sup> |                | 1.535   | 110.4            | 116.2        | 114.0      |
|                   | g <sup>-</sup> |                | 1.536   | 112.5            | 117.1        | -101.3     |
| g <sup>+</sup>    | t              |                | 1.533   | 113.6            | 113.2        | 5.9        |
|                   | g <sup>+</sup> |                | 1.534   | 114.6            | 115.9        | 117.8      |
|                   | g <sup>-</sup> |                | 1.535   | 115.6            | 117.1        | -104.7     |
| g <sup>-</sup>    | t              |                | 1.533   | 113.2            | 113.2        | 2.8        |
|                   | g <sup>+</sup> |                | 1.534   | 113.0            | 115.1        | 107.4      |
|                   | g <sup>-</sup> |                | 1.536   | 115.9            | 116.3        | -98.2      |
| t                 | t              | g <sup>-</sup> | 1.534   | 109.1            | 113.2        | -4.3       |
|                   | g <sup>+</sup> |                | 1.536   | 112.5            | 117.1        | 101.3      |
|                   | g <sup>-</sup> |                | 1.535   | 110.4            | 116.2        | -114.0     |
| g <sup>+</sup>    | t              |                | 1.533   | 113.2            | 113.2        | -2.8       |
|                   | g <sup>+</sup> |                | 1.536   | 115.9            | 116.3        | 98.2       |
|                   | g <sup>-</sup> |                | 1.534   | 113.0            | 115.1        | -107.4     |
| g <sup>-</sup>    | t              |                | 1.533   | 113.6            | 113.2        | -5.9       |
|                   | g <sup>+</sup> |                | 1.535   | 115.6            | 117.1        | 104.7      |
|                   | g <sup>-</sup> |                | 1.534   | 114.6            | 115.9        | -117.8     |

<sup>a</sup>  $j$  denotes the current bond. The blank line represents that the conformation is inexistent. <sup>b</sup> Length of bond  $j$  in Å. <sup>c</sup> Angle formed between bonds  $j-1$  and  $j$  in deg. <sup>d</sup> Angle formed between bonds  $j$  and  $j+1$  in deg. <sup>e</sup> Dihedral angle of bond  $j$  in deg.

**Table S7** Average geometrical parameters of PA2T, PA3T, PTA2T, and PTA3T

|       | bond | bond length (Å) | bond angle (°) | dihedral angle (°)       |                                    |                    |              |
|-------|------|-----------------|----------------|--------------------------|------------------------------------|--------------------|--------------|
|       |      |                 |                | $\phi_t$ or $\phi_{t-t}$ | $\phi_g^\pm$ or $\phi_{(t-c)^\pm}$ | $\phi_{(c-t)^\pm}$ | $\phi_{c-c}$ |
| PA2T  | a    | 1.360           | 117.5          | 0.1                      |                                    |                    |              |
|       | b    | 5.810           | 117.5          | 0.0                      | $\pm 53.6$                         | $\pm 123.0$        | 180.0        |
|       | c    | 1.360           | 122.5          | 0.1                      |                                    |                    |              |
|       | d    | 1.458           | 112.9          | 0.0                      | $\pm 92.2$                         |                    |              |
|       | e    | 1.529           | 112.9          | 0.2                      | $\pm 113.9$                        |                    |              |
|       | f    | 1.458           | 122.5          | 0.0                      | $\pm 92.2$                         |                    |              |
| PA3T  | a    | 1.359           | 118.7          | 0.0                      |                                    |                    |              |
|       | b    | 5.823           | 118.7          | 0.0                      | $\pm 46.9$                         | $\pm 129.2$        | 180.0        |
|       | c    | 1.359           | 123.0          | 0.0                      |                                    |                    |              |
|       | d    | 1.458           | 112.8          | -19.0                    | $\pm 72.1$                         |                    |              |
|       | e    | 1.531           | 112.8          | -0.2                     | $\pm 116.2$                        |                    |              |
|       | f    | 1.531           | 112.8          | -0.2                     | $\pm 116.2$                        |                    |              |
|       | g    | 1.458           | 123.0          | -19.0                    | $\pm 72.1$                         |                    |              |
| PTA2T | a    | 1.340           | 115.3          | 0.1                      |                                    |                    |              |
|       | b    | 5.793           | 115.3          | 0.0                      | $\pm 79.6$                         | $\pm 98.0$         | 180.0        |
|       | c    | 1.340           | 125.8          | 0.1                      |                                    |                    |              |
|       | d    | 1.457           | 112.4          | -2.2                     | $\pm 88.4$                         |                    |              |
|       | e    | 1.529           | 112.4          | 0.0                      | $\pm 113.3$                        |                    |              |
|       | f    | 1.457           | 125.8          | -2.2                     | $\pm 88.4$                         |                    |              |
| PTA3T | a    | 1.338           | 115.1          | 0.3                      |                                    |                    |              |
|       | b    | 5.808           | 115.1          | 0.0                      | $\pm 75.8$                         | $\pm 102.5$        | 180.0        |
|       | c    | 1.338           | 125.9          | 0.3                      |                                    |                    |              |
|       | d    | 1.459           | 111.7          | 4.0                      | $\pm 88.4$                         |                    |              |
|       | e    | 1.529           | 112.4          | -0.2                     | $\pm 111.3$                        |                    |              |
|       | f    | 1.529           | 111.7          | -0.2                     | $\pm 111.3$                        |                    |              |
|       | g    | 1.459           | 125.9          | 4.0                      | $\pm 88.4$                         |                    |              |

**Table S8** Average geometrical parameters of P2TS<sub>2</sub>, P3TS<sub>2</sub>, P2TS<sub>4</sub>, and P3TS<sub>4</sub>

|                   | bond | bond length (Å) | bond angle (°) | dihedral angle (°)       |                                      |                    |              |
|-------------------|------|-----------------|----------------|--------------------------|--------------------------------------|--------------------|--------------|
|                   |      |                 |                | $\phi_t$ or $\phi_{t-t}$ | $\phi_{g^\pm}$ or $\phi_{(t-c)^\pm}$ | $\phi_{(c-t)^\pm}$ | $\phi_{c-c}$ |
| P2TS <sub>2</sub> | a    | 1.802           | 117.9          | 0.0                      |                                      |                    |              |
|                   | b    | 5.787           | 117.9          | 0.0                      |                                      |                    | 180.0        |
|                   | c    | 1.802           | 99.4           | 0.0                      |                                      |                    |              |
|                   | d    | 1.832           | 113.1          | -0.2                     | ±97.3                                |                    |              |
|                   | e    | 1.523           | 113.1          | 0.0                      | ±115.0                               |                    |              |
|                   | f    | 1.832           | 99.4           | -0.2                     | ±97.3                                |                    |              |
| P3TS <sub>2</sub> | a    | 1.807           | 118.2          | 0.0                      |                                      |                    |              |
|                   | b    | 5.793           | 118.2          | 0.0                      |                                      |                    | 180.0        |
|                   | c    | 1.807           | 99.0           | 0.0                      |                                      |                    |              |
|                   | d    | 1.837           | 113.6          | 0.0                      | ±95.2                                |                    |              |
|                   | e    | 1.532           | 113.3          | 0.0                      | ±110.8                               |                    |              |
|                   | f    | 1.532           | 113.6          | 0.0                      | ±110.8                               |                    |              |
|                   | g    | 1.837           | 99.0           | 0.0                      | ±95.2                                |                    |              |
| P2TS <sub>4</sub> | a    | 1.762           | 113.0          | 0.1                      |                                      |                    |              |
|                   | b    | 5.787           | 113.0          | 0.0                      | ±71.5                                | ±106.3             | 180.0        |
|                   | c    | 1.762           | 104.5          | 0.1                      |                                      |                    |              |
|                   | d    | 1.826           | 113.3          | 1.2                      | ±85.1                                |                    |              |
|                   | e    | 1.525           | 113.3          | 0.0                      | ±112.8                               |                    |              |
|                   | f    | 1.826           | 104.5          | 1.2                      | ±85.1                                |                    |              |
| P3TS <sub>4</sub> | a    | 1.768           | 113.0          | 0.0                      |                                      |                    |              |
|                   | b    | 5.788           | 113.0          | 0.0                      | ±70.8                                | ±106.3             | 180.0        |
|                   | c    | 1.768           | 104.3          | 0.0                      |                                      |                    |              |
|                   | d    | 1.832           | 113.3          | 0.8                      | ±91.3                                |                    |              |
|                   | e    | 1.534           | 113.7          | 0.0                      | ±110.4                               |                    |              |
|                   | f    | 1.534           | 113.3          | 0.0                      | ±110.4                               |                    |              |
|                   | g    | 1.832           | 104.3          | 0.8                      | ±91.3                                |                    |              |
